# Supplementary material for: Dereverberation and denoising based on generalized spectral subtraction by multi-channel LMS algorithm using a small-scale microphone array
Source: Springer Nature journal article supplement (doi:10.1186/1687-6180-2012-12), 2012-01-17
Supplement: 13634_2011_146_MOESM1_ESM.pdf [file 13634_2011_146_MOESM1_ESM.pdf]

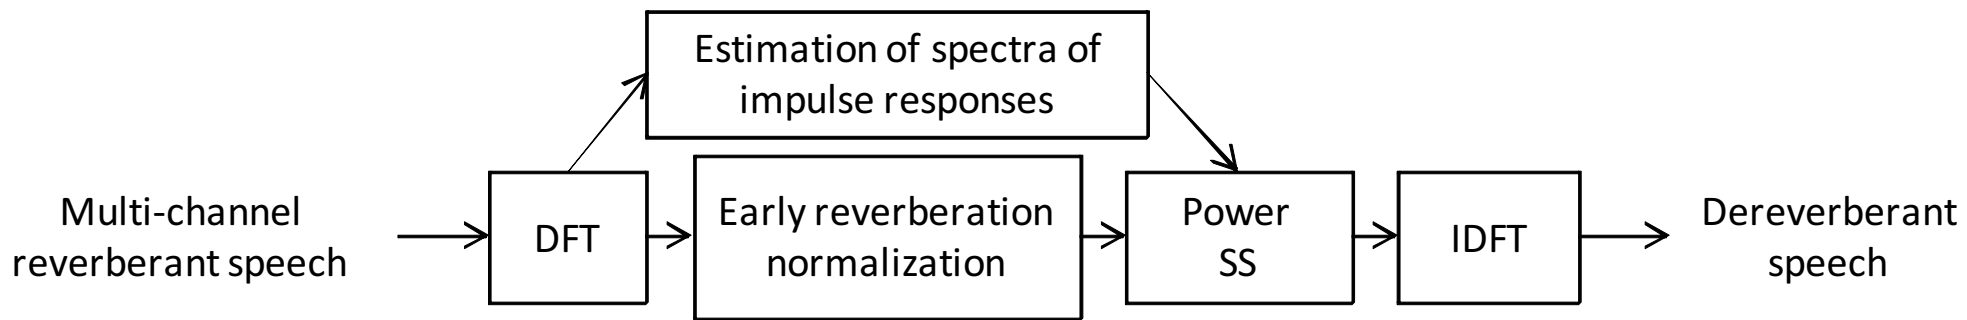

(a) original method

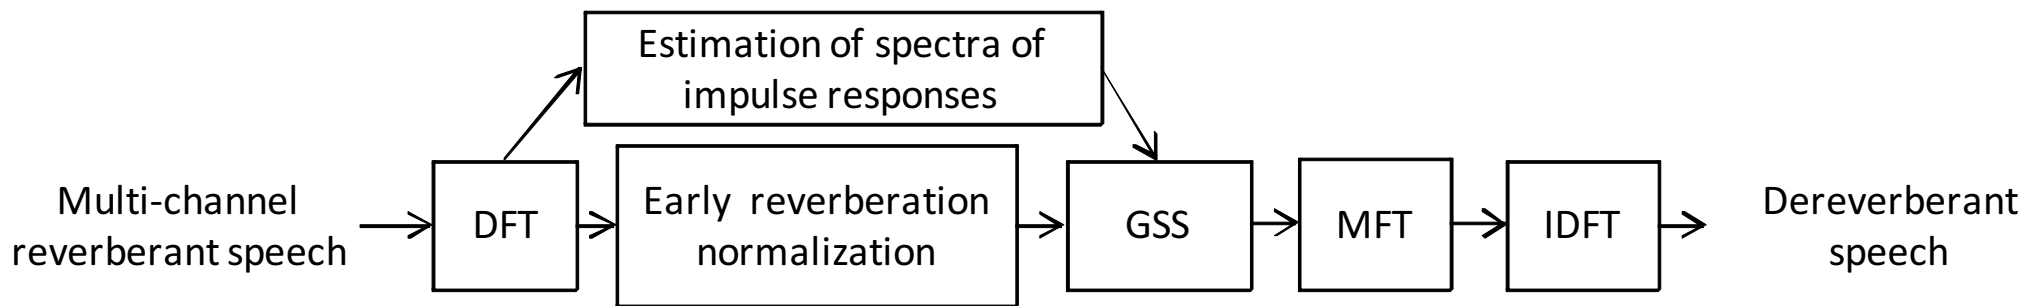

(b) proposed method
