# Supplementary material for: Dereverberation and denoising based on generalized spectral subtraction by multi-channel LMS algorithm using a small-scale microphone array
Source: Springer Nature journal article supplement (doi:10.1186/1687-6180-2012-12), 2012-01-17

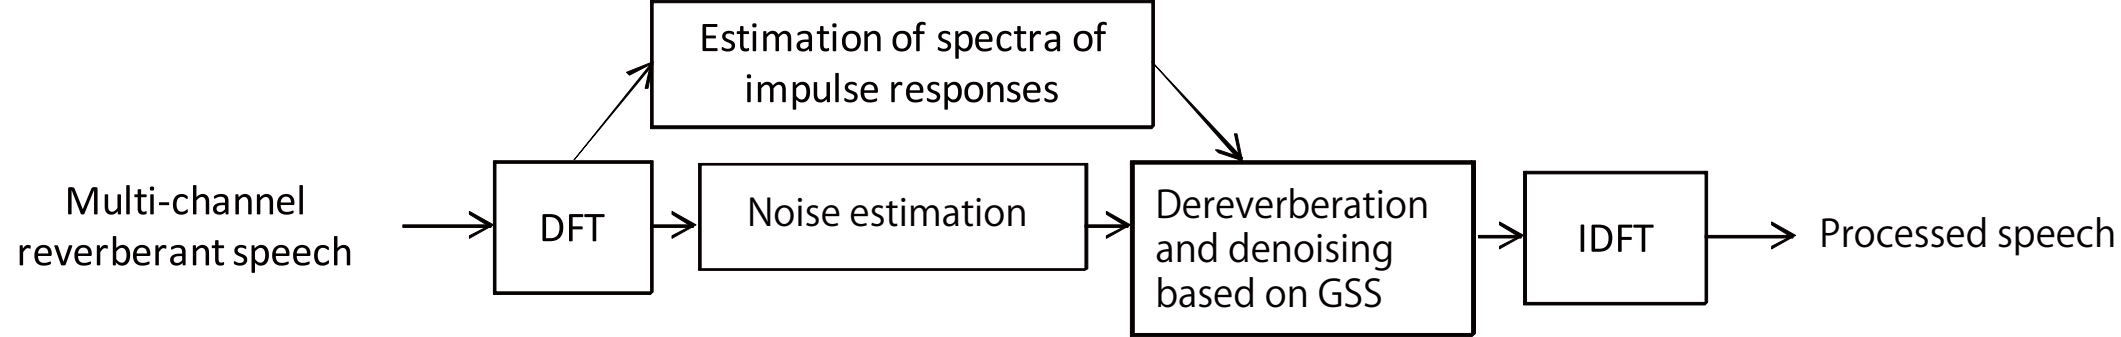

Supplement: 13634_2011_146_MOESM2_ESM.pdf [file 13634_2011_146_MOESM2_ESM.pdf]
